# Supplementary material for: Directional and balancing selection in human beta-defensins
Source: PubMed Central journal article supplement (PMC2373304; doi:10.1186/1471-2148-8-113), 2008-04-16
Supplement: 1471-2148-8-113-S1.pdf [file 1471-2148-8-113-S1.pdf]

# Supplementary figure 1

```

DEFB1_hsa      MRTSYLLLFTLCLLSEMASGGNFLTGLGHRSDHYNCVSSGGQCLYSACPIFTKIQGTCY 60
DEFB1_ptr      MRTSYLLLFTLCLLSEMASGGNFLTGLGHRSDHYNCVSSGGQCLYSACPIFTKIQGTCY 60
DEFB1_ggo      MRTSYLLLFTLCLLSEIASGGNFLTGLGHRSDHYNCVSSGGQCLYSACPIFTKIQGTCY 60
DEFB1_ppy      MRTSYLLLFTLCLLSEMASGGNFLTGLGHRSDHYNCVSSGGQCLYSACPIFTKIQGTCY 60
DEFB1_hla      MRTSYLLLFTLCLLSEMASGDNFLTGLGHRSDHYNCVSSGGQCLYSACPIYTKIQGTCY 60
DEFB1_mfa      MRTSYLLLFTLCLLSEMASGDNFLTGLGHRSDHYNCVSSGGQCLYSACPIYTRIQGTCY 60
DEFB1_mam      MRTSYLLLFTLCLLSEMASGDNFLTGLGHRSDHYNCVSSGGQCLYSACPIYTRIQGTCY 60
*****:***.***** *****:*:*****

```

P P

```

DEFB1_hsa      RGKAKCCK 68
DEFB1_ptr      GGKAKCCK 68
DEFB1_ggo      GGKAKCCK 68
DEFB1_ppy      RGKAKCCK 68
DEFB1_hla      QGKAKCCK 68
DEFB1_mfa      HGKAKCCK 68
DEFB1_mam      HGKAKCCK 68
*****

```

S

```

DEFB4_hsa_1    MRVLYLLFSFLFIFLMPLPGVFGGIGDPVTCLKSGAICHPVFCPRRYKQIGTCGLPGTKC 60
DEFB4_ptr_1    MRVLYLLFSFLFIFLMPLPGVFGGISDPVTCLKSGAICHPVFCPRRYKQIGTCGLPGTKC 60
DEFB4_ggo_1    MRVLYLLFSFLFIFLMPLPGVFGGIGDPVTCLKSGAICHPVFCPRRYKQIGTCGLPGTKC 60
DEFB4_ppy_1    MRVLYLLFSFLFIFLMPLPGVFGGIGDPVTCLKSGAICHPVFCPRRYKQIGTCGLPGTKC 60
DEFB4_hla_1    MRVLYLLFSFPFIFLMPLPGVFGDIRNPVTCLKSGAICHPVFCPRRYKQIGTCGLPGTKC 60
DEFB4_mfa_1    MRVLYLLFSFPFIFLMPLPGVFGDIRNPVTCVRSGAICLPGF CPRRYKHIGVCGVSAIKC 60
DEFB4_mam_1    MKVLYLLFSFLFIFLMPLPGVFGDIRNPVTCVRSGAICLPGF CPRRYKHIGVCGVSAIKC 60
*:***** *****. * :***:***** * *****:*. **:. **

```

```

DEFB4_hsa_1    CKKP 64
DEFB4_ptr_1    CKKP 64
DEFB4_ggo_1    CKKP 64
DEFB4_ppy_1    CKKP 64
DEFB4_hla_1    CRKP 64
DEFB4_mfa_1    CKKP 64
DEFB4_mam_1    CKKP 64
*:**

```

```

DEFB103_hsa_1 MRIHYLLFALLFLFLVPVPGHGGIINTLQKYYCRVRGGRCAVLSCLPKEEQIGKCSTRGR 60
DEFB103_ptr_1 MRIHYLLFALLFLFLVPVPGHGGIINTLQKYYCRVRGGRCAVLTCLPKEEQIGKCSTRGQ 60
DEFB103_ggo_1 MRIHYLLFTLLFLFLVPVPGHGGIINTLQKYYCRVRGGRCAVLSCLPKEEQIGKCSTRGR 60
DEFB103_ppy_1 MRIHYLLFALLFLFLVPVPGHGGIINTLQKYYCRVRGGRCAVLSCLPKEEQIGKCSTRGR 60
DEFB103_mam_1 MRIHYLLFALLFLFLVPVPGHGGIINTLQKYYCRVRGGRCAVLSCLPKEEQIGKCSTRGR 60
*****:*****:*****:*****:*****:*****:*****:*****:*****:

```

```

DEFB103_hsa_1 KCCRRKKK 68
DEFB103_ptr_1 KCCRRKKE 68
DEFB103_ggo_1 KCCRRKKK 68
DEFB103_ppy_1 KCCRRKKK 68
DEFB103_mam_1 KCCRRKKK 68
*****:

```

DEFB104\_hsa\_1 MQRLLVLLLAISLLLLYQDLPVRSEFELDRICGYGTARCRKKCRSQEYRIGRCPNTYACCLR 60  
DEFB104\_ptr\_1 MQRLLVLLLAISLLLLYQDLPVRSEFELDRICGYGTARCRKKCRSQEYRIGRCPNTYACCLR 60  
DEFB104\_ggo\_1 MRRLVLLLAISLLLLYQDLPVRSEFELDRICGYGTARCRKKCRSQEYRIGRCPNTFACCLR 60  
DEFB104\_ppy\_1 MRRLVLLLAISLLLLYQDLPVRSEFELDRICGYGTARCRKKCRSQEYRIGRCPNTYACCLR 60  
DEFB104\_hla\_1 MRRLVLLLTISVLLYQDLPVRSEFEWDRICGYGTARCRNKCRSQEYRIGRCPNTFACCLR 60  
DEFB104\_mam\_1 MQRLLVLLLAISLLFYQDLPVRSEFELDRICGYGTARCRNKCRSQEYKIGRCPNSYACCLR 60  
\*:\*\*\*\*\*:\*\*\*:\*:\*\*\*\*\* \* :\*\*\*\*\*:\*\*\*\*\*:\*\*\*\*\*

DEFB104\_hsa\_1 KWDESLLNRTKP 72  
DEFB104\_ptr\_1 KWDESLLNRTKP 72  
DEFB104\_ggo\_1 KWDESLLNRTKP 72  
DEFB104\_ppy\_1 KWDESLLNRTKP 72  
DEFB104\_hla\_1 KWDESLLNSTKP 72  
DEFB104\_mam\_1 KWDESLLNRTKP 72  
\*\*\*\*\* \*\*

DEFB105\_hsa\_1 MALIRKTFYFLFAMFFILVQLPSGCQAGLDFSQPFPSGEFAVCECKLGRGKCRKECLEN 60  
DEFB105\_ptr\_1 MALIKKTFYFLFAMFFILVQLSSGCQAGLDFSQPFPSGEFAVCECKLGRGKCRKECLEN 60  
DEFB105\_ggo\_1 MALIRKTFYFLFAVFFILVQLPSGCQAGLDFSQPFPSGEFAVCECKLGRGKCRKECLEN 60  
DEFB105\_ppy\_1 MALIRKTFYFLFAVFFVILVQLPSECQAGLDFSQPFPSDEFVAVCECKLGRGKCRKECLEN 60  
DEFB105\_hla\_1 MALIRKTFYFLFAVFFILVQLPSGCQAGLDFSQPFPSGEFAVCECKFSRGRGKCRKECLEN 60  
DEFB105\_mfa\_1 MALIRKTFYFVFAVFFILVQQPSGCQAGLEFSEPFPSGRFAVCECKLGRGKCRKECLEN 60  
DEFB105\_mam\_1 MALIRKTFYFVFAVFFVILVQQPSGCQAGLEFSEPFPSGRFAVCECKLGRGKCRKECLEN 60  
\*\*\*\*:\*\*\*:\*\*\*:\*\*\*:\*\*\*:\*\*\* \* \*\*\*\*\*:\*\*\*:\*\*\*\*\* \* :\*\*\*\*\*:\*\*\*\*\*

DEFB105\_hsa\_1 EKPDGNCRLNFLCCRQRI 78  
DEFB105\_ptr\_1 EKPDGNCRLNFLCCRQRI 78  
DEFB105\_ggo\_1 EKPDGNCRLNFLCCRQRI 78  
DEFB105\_ppy\_1 EKPDGNCRLNFLCCRERI 78  
DEFB105\_hla\_1 EKPDGNCRLNFLCCRQSI 78  
DEFB105\_mfa\_1 EKPDGSCRLNFLCCRPRM 78  
DEFB105\_mam\_1 ERPDGSCRLNFLCCRPRM 78  
\*:\*\*\*.\*\*\*\*\* :

DEFB106\_hsa\_1 MRTFLFLFAVLFFLTPAKNAFFDEKCNKLGKGTCKNNCGKNEELIALCQKSLKCCRTIQPC 60  
DEFB106\_ptr\_1 MRTFLFLFAVLFFLTPAKNAFFDEKCNKLGKGTCKNNCGKNEELIALCQKSLKCCRTIQPC 60  
DEFB106\_ggo\_1 MRTFLFLFAVLFFLTPAKNAFFDEKCNKLGKGTCKNNCGKNEELIALCQKSLKCCRTIQPC 60  
DEFB106\_ppy\_1 MRTFLFLFAVLFFLTPAKNEFFDEKCGKLGKGTCKNNCGKNEELIALCQKSLKCCRTIQPC 60  
DEFB106\_mfa\_1 MRTFLFLFVVLFFLTPAKNAFFDDKCDKLRGTCKNSCEKNEELTSFCQKSLKCCRTIQT 60  
DEFB106\_mam\_1 MRTFLFLFVVLFFLTPAKNAFFDDKCDKLRGTCKNNCEKNEELTSFCQKSLKCCRTIQT 60  
\*\*\*\*\*.\*\*\*\*\* \*\*\*:\*\*\*.\*\*\*:\*\*\*\*\* \* \*\*\*\*\* :\*\*\*\*\*.\*\*\*

DEFB106\_hsa\_1 GSIID 65  
DEFB106\_ptr\_1 GSIID 65  
DEFB106\_ggo\_1 GSIID 65  
DEFB106\_ppy\_1 GSIID 65  
DEFB106\_mfa\_1 GNTTD 65  
DEFB106\_mam\_1 GNTTD 65  
\* . \*

DEFB107\_hsa\_1 MKIFVVFILAALILLAQIFQARTAIHRALISKRMEGHCEAECLTFEVKIGGCRAELAPFCC 60  
DEFB107\_ptr\_1 MKIFFFFIFAALILLAQIFQARTAIHRALISKRMEGHCEAECLTFEVKTGGCRAELAPFCC 60  
DEFB107\_ggo\_1 MKIFFFFIFAALFLLAQIFQARTAIHRALICKRMEGHCEAECLTFEAKIGGCRAELAPFCC 60  
DEFB107\_ppy\_1 MKIFFFFIFAALILLAQIFQARTAIHRALICKRMEGHCEAECLTFEVKIGGCRAELAPFCC 60  
DEFB107\_hla\_1 MKIFFFFIFAALILLAQIFQARTAIHRALICKRMEGHCEAECLTFEVKIGGCRAELAPFCC 60  
DEFB107\_mfa\_1 MKIFFFFIFAALILLAQIFQARTAIHRALICKRMEGHCEAECLTFEVKIGGCRAELTPYCC 60  
DEFB107\_mam\_1 MKIFFFFIFAALILLAQIFQARTAIHRALICKRMEGHCEAECLTFEVKIGGCRAELTPYCC 60  
\*\*\*\*\_\*:\*\*\*:\*\*\*\*\*\_\* \*\*\*\*\*\_\* \*\*\*\*\*:\*\*\*:\*\*\*

DEFB107\_hsa\_1 KNRKKH 66  
DEFB107\_ptr\_1 KNRKKH 66  
DEFB107\_ggo\_1 KNRKKH 66  
DEFB107\_ppy\_1 KNRKKH 66  
DEFB107\_hla\_1 KNRKKH 66  
DEFB107\_mfa\_1 KKRKKD 66  
DEFB107\_mam\_1 KKRKKD 66  
\*:\*:\*\*

DEFB118\_hsa MKLLLLALPMLVLLPQVIPAYSGEKKCWNRSGHCRKQCKDGEAVKDTCKNLRACCIPSNE 60  
DEFB118\_ptr MKLLLLALPVLVLLPQVIPAYSGEKKCWNRSGHCRKQCKDGEAVKDTCKNLRACCVPSNE 60  
DEFB118\_ggo MKLLLLALPMLVLLPQVIPAYSGEKKCWNRSGHCRKQCKDGEAVKDTCKNLRACCVPSNE 60  
DEFB118\_ppy MKLLLLALPMLVLLPQVIPAYSGEKKCWNRSGHCRKQCKDGEAVKDTCKNLRACCVPSNE 60  
DEFB118\_hla MKLLLLALPMLVLLPQVIPAYSGEKKCWNRSGHCRKQCKDGEAVKDTCKNLRACCVPSNE 60  
DEFB118\_mfa MKLLLLALPILVLLPQVIPAYGGEKKCWNRSGHCRKQCKDGEAVKETCKNHRACCVPSNE 60  
DEFB118\_mam MKLLLLALPILVLLPQVIPAYGGEKKCWNRSGHCRKQCKDGEAVKETCKNHRACCVPSNE 60  
\*\*\*\*\*:\*\*\*\*\*\_\* \*\*\*\*\*\_\* \*\*\*\*\*:\*\*\* \*\*\*\*\*:\*\*\*

P P

DEFB118\_hsa DHRRVPATSPPTPLSDSTPGIIDDILTVRF'TTDYFEVSSKKDMVEESEAGRGTETSLPNVH 120  
DEFB118\_ptr DHRRVPM'TSPPTPLSDSTPGIIDDILTVRF'TTDYFEVSSKKDMVEESEAGRGTETSLPNVH 120  
DEFB118\_ggo DHRRVPTTSPPTPLSDSTPGIIDDILTVRF'TTDYFEVSSKKDMIEESEAGRGTETSLPNVH 120  
DEFB118\_ppy DHRRVPTTSPPTPLSDSTRGVIDDILTVRF'TTDYFEVSSKKNMVEESEAVGQGTQTSLPNVH 120  
DEFB118\_hla DHRQVPTTSPPTPLSDSTPGSIDDILTVRF'TTDYFEVSSKKDMVEESEAGWGTQTSLPDVH 120  
DEFB118\_mfa DHRRVPTTSPPTPLSDSTPGIIDNILLIRF'TTDYFEISSKKDMVEESEAGQGTQTSPPNVH 120  
DEFB118\_mam DHRRLP'TTSPPTPLSDSTPGIIDNILLIRF'TTDYFEISSKKDMVEESEAGQGTQTSPPNVH 120  
\*\*\*:\*\*\* \*\*\*\*\*\_\* \*\*:\*:\*\*:\*\*\*\*\*\_\* \*\*\*\*\*\_\* \*\*\*\*\*:\*\*\* \*\*:\*:\*\*

S

DEFB118\_hsa HSS 123  
DEFB118\_ptr HSS 123  
DEFB118\_ggo HSS 123  
DEFB118\_ppy HSS 123  
DEFB118\_hla HSS 123  
DEFB118\_mfa HTS 123  
DEFB118\_mam HTS 123  
\*:\*

DEFB119\_hsa\_1 MKLLYLFLAILLAIIEPVISGKRHILRCMNSGICRASCKKNEQPYLYCRNCQSCCLQSY 60  
DEFB119\_ptr\_1 MKLLYLFLAILLAIIEPVISGKRHILRRMNSGICRASCKKNEQPYLYCRNYQSCCLQSY 60  
DEFB119\_ggo\_1 MKLLYLFLAILLAIIEPVISGKRHILRCMNSGICRASCKKNEQPYLYCRNYQSCCLQSY 60  
DEFB119\_ppy\_1 MKLLYLFLAILLVIEEPVISGKRYILRCMNSGICRASCKRNEQPYLYCKNYQSCCLQSY 60  
DEFB119\_hla\_1 MKLLYLFLAILLAIIEPVISGKHHILRCMNSGICRASCKKNEQPYLYCRNYQHCCCLQSY 60  
DEFB119\_mfa\_1 MKFLFLFLAILLATKIPVISGKRHNLRCMNSGICRASCKKNEQPYLYCRNYQACCLQSY 60  
DEFB119\_mam\_1 MKFLFLFLAILLATEVPVISGKRHILRCMNSGICRASCKKNEQPYLYCRNYQACCLQSY 60  
\*\*::\*\*\*\*\* : \*\*\*\*\*:: \*\* \*\*\*\*\*:\*\*\*\*\*: \* \* \*\*\*\*\*

DEFB119\_hsa\_1 MRISISGKEENTDWSYEQWPRLP 84  
DEFB119\_ptr\_1 MRISISGKEENTDWSYEQWPRLP 84  
DEFB119\_ggo\_1 MRISISGKEEDTWSYEQWPRLP 84  
DEFB119\_ppy\_1 MRISISGKEENTDWSYEQWPKLP 84  
DEFB119\_hla\_1 MRISISGEEENTDWSYEQWPRLP 84  
DEFB119\_mfa\_1 MRISISGKEENTDWSYEQWPRLP 84  
DEFB119\_mam\_1 MRISISGKEENTDWSYEQWPRLP 84  
\*\*\*\*\*:\*\*\*:\*\*\*\*\*:\*\*\*

DEFB120\_hsa\_1 MKLLYLFLAILLAIIEPVISVECWMDGHCRLLCCKDGEDSIIRCRNRKRCCVPSRYLTIQP 60  
DEFB120\_ptr\_1 MKLLYLFLAILLAIIEPVISVECWMDGHCRLLCCKDGEDSIIRCRNRKRCCVPSRYLTIQP 60  
DEFB120\_ggo\_1 MKLLYLFLAILLAIIEPVISVECWMDGHCRLLCCKDGEDSIIRCRNRKRCCVPSRYLTIQP 60  
DEFB120\_ppy\_1 MKLLYLFLAILLVIEEPVISVECWMDGHCRLLCCKDGEDSIIRCRNRKRCCVPSRYLTIQP 60  
DEFB120\_hla\_1 MKLLYLFLAILLAIIEPVISVECWMDGHCRLLCCKDGEDSIIRCRNRKRCCVPSRYLTIQP 60  
DEFB120\_mfa\_1 MKFLFLFLAILLATKIPVISVECWMDGHCRLLCCKDGEDSIIRCRNRKRCCVPSRYLTIQP 60  
DEFB120\_mam\_1 MKFLFLFLAILLATEVPVISVECWMDGHCRLLCCKDGEDSIIRCRNRKRCCVPSRYLTIQP 60  
\*\*::\*\*\*\*\* : \*\*\*\*\*:\*\*\*\*\*

P P

DEFB120\_hsa\_1 VTIHGILGWTFPQMSTTAPKMKTNITNR 88  
DEFB120\_ptr\_1 VTIHGILGWTFPQMSTTAPKTKTNITNR 88  
DEFB120\_ggo\_1 VTIHGILGWTFPQMSTTAPKTKTNITNR 88  
DEFB120\_ppy\_1 VTIHGILGWTFPQMPTTAPKAKRNITNR 88  
DEFB120\_hla\_1 VTIHGILGWTFPQMSTTAPKMKRNITNR 88  
DEFB120\_mfa\_1 VTIHGILGWTFPRMSTTAPQPKRNINHNG 88  
DEFB120\_mam\_1 VTIHGILGWTFPRMSTTAPQPKRNINHNG 88  
\*\*\*\*\*:\*.\*\*\*\*: \* \* \*

S

DEFB123\_hsa\_1 MKLLLLTLTVLLLLSQLTPGGTQRCWNLYGKCRYRCSKKERVYVYCVNNKMCCVKPKYQP 60  
DEFB123\_ptr\_1 MKLLLLTLTVLLLLSQLTPGGTQRCWNLYGKCRYRCSKKERVYVYCVNNKMCCVKPKYQP 60  
DEFB123\_ggo\_1 MKLLLLTLTVLLLLSQLTPGGTQRCWNLYGKCRYRCSKKERVYVYCVNNKMCCVKPKYQP 60  
DEFB123\_ppy\_1 MKLLLLTLTVLLLLSQLTPGGTQRCWHRCCKKERVYVYCVNNKMCCVKPKYQP 60  
\*\*\*\*\*:\*\*\*\*\*:\*\*\*\*\*

DEFB123\_hsa\_1 KERWWPF 67  
DEFB123\_ptr\_1 KERWWPF 67  
DEFB123\_ggo\_1 KERWWPF 67  
DEFB123\_ppy\_1 KERWRF 67  
\*\*\*\*\* \*

DEFB125\_hsa MNILMLTFIICGLLTRVTKGSFEPQKCWKNNVGHCRRRCLDTERYILLCRNKLSCCIS-I 59  
DEFB125\_ptr MNILMLTFIICGLLTQVTKGSFEPKCGNNIGHCRKRCLDTERYILLCRNKLSCCIYII 60  
DEFB125\_ggo MNILMLTFIICGLLTQVTKGSFEPQKCWKNIGHCRRRCLDTERCILLCRNKLSCCIYII 60  
DEFB125\_ppy MNLLMLTFIICGLLTQVTKGSFEPQKCWKNIGHCRRRCLDTERYILLCRNKLSCCISII 60  
DEFB125\_hla MNLLMLTFIICGLLTQVTKGSFEPKCGNNIGHCRRRCLDTERYIILVCRNKLSCCISII 60  
DEFB125\_mfa MNLLILTFIICGLLTQVTKGSFEPQKCWKNNIGYCRRRCLDTERYILLCRNKLSCCISII 60  
DEFB125\_mam MNLLILTFIICGLLTQVTKGSFEPQKCWKNNIGYCRRRCLDTERYILLCRNKLSCCISII 60  
\*\*:\*:\*\*\*\*\*:\*\*\*\*\* \*\* :\*:\*:\*:\*\*\*\*\* \*\* :\*\*\*\*\*

DEFB125\_hsa ISHEYTRRPAFPVIHLEDITLDYSDVDSFTGSPVSMNLNDLITFDTTKFGETMTPETNTPE 119  
DEFB125\_ptr ISHEYTRRPAFPMIHLEDITFDYSDVDSFTGSPVSMNLNDLITFDTTKFGETMTPETNTPE 120  
DEFB125\_ggo ISHEYTRRPAFPMIHLEDITFDYSDVDSFTGSPVSMNLNDLITFDTTKFGETMTPETNTPE 120  
DEFB125\_ppy ISHEYTRRPAFPVIHLEDITFDYSDVDSFTGSPVSMNLNDLITFDTTKFGETITPETNTPE 120  
DEFB125\_hla ISHEYTRRPAFPVIHPEDITFDYSDVDSFTGSPVSMNLNDLITFDTTKFGETMTPETNTPE 120  
DEFB125\_mfa ISYEYTRPPFRVIHLEDITFDYSDMGSFTGSPVSKLSDLVTFDIRR--ETMTPKTNTPE 118  
DEFB125\_mam ISYEYTRPPFRVIHLEDITFDYSDMGSFTGSPVSKLSDLVTFDIRR--ETMTPKTNTPE 118  
\*\*:\*:\*\*\*:\* \*\* :\*\* \*\*\*\*\*:\*\*\*\*\*: \*\*\*\*\* \* \_\*\*:\* \*\* : \*\*:\*:\*\*\*\*\*

DEFB125\_hsa TTMPPEATTPEATTMPPESETATPRLCHHLLRQLLLIIN 157  
DEFB125\_ptr TTMPPETTTTPEATTMPPESETATSETMPPPLS-QTALTHN 157  
DEFB125\_ggo TTVPPETTTTPEATTMPPESETATSETMPPPS-QTALTHN 157  
DEFB125\_ppy TTMPPEATTSSKTTMPPESETATSET-MPPPSQTALTHN 157  
DEFB125\_hla TTMPPS-----KTTTSKTTMPPPSQTALTHN 146  
DEFB125\_mfa TTMPPETTTTSKTTMPSSKTTTSKTTMPPPSQMALTHN 156  
DEFB125\_mam TTMPPETTTTSKTTMPSSKTTTSKTTMPPPSQMALTHN 156  
\*\*:\*:\*\*\* :\*\*:\* . \* \* \*

DEFB126\_hsa MKSLLFTLAVFMLLAQLVSGNWYVKKCLNDVGICKKKCKPEEMHVKNWAMCGKQRDCCV 60  
DEFB126\_ptr MKSLLFTLAVFMLLAQLVSGNWYVKKCLNDVGICKKKCKPGEHVKNGWATCGKQRDCCV 60  
DEFB126\_ggo MKSLLFTLAVFMLLAQLVSGNWYVKKCLNDVGICKKKCKPEEMHVKNWAMCGKQRDCCV 60  
DEFB126\_ppy MKSLLFTLAVFMLLAQLVSGSWYVKKCLNDVGICKKKCKPEELHVKNWAMCGKQRDCCV 60  
DEFB126\_hla MKSLLFTLAVFMLLAQLVSGNWYVKKCLNDVGICKKKCKPEELHVKNGRAMCGKQRDCCV 60  
DEFB126\_mfa MKSLLFTLAVFMLLAQLVSGNLYVKRCLNDIGICKKTKPPEVRSEHGWMCGKRAKCCV 60  
DEFB126\_mam MKSLLFTLAVFMLLAQLVSGNLYVKRCLNDIGICKKTKPPEVRSEHGWMCGKRAKCCV 60  
\*\*\*\*\*:\*\*\*\*\*:\*\*\*\*\* \*\* \*:: ::\* . \*\*\*: : \*\*

DEFB126\_hsa PADRRANYPVFCVQTKTTRISTVTATTAT-----TTLMMTTASMSSMA----- 103  
DEFB126\_ptr PADRRANYPAFVQTKTTRTSTVTAK-----TTLMVTASMSMA----- 100  
DEFB126\_ggo PADRRANYPAFVQTKTTRTSTVTATTAT-----TTLMMTTASMSLMA----- 103  
DEFB126\_ppy PADKRANYPAFVQTKTTRTSTVTATTATRATTAT--TTTLMMTTASMSSMT----- 110  
DEFB126\_hla PADKRANYPAFVQTKTTRTSTVTATAAT-----TTTLVMTTASMSMA----- 104  
DEFB126\_mfa PADKRAYSFVHVKTTKTSTVTARATATTATTATAATPLMISNGLISMSYDGRYPCF 120  
DEFB126\_mam PADKRAYSFVRSKTTKTSTVTARATATTATTATAATPLMISNGLISLMT----- 112  
\*\*:\*: \*\* \*\*\*\*\*:\*\*\*\*\* \*\*\*\*\* \* \_\*::: . :\* \*\*

DEFB126\_hsa ----PTRFSHWLSLCLLLX 118  
DEFB126\_ptr ----PTPVSPG----- 108  
DEFB126\_ggo ----PTPVSPG----- 111  
DEFB126\_ppy ----PTPVSPG----- 118  
DEFB126\_hla ----PTPVSPS----- 112  
DEFB126\_mfa SHYLNIPASVSCSR----- 135  
DEFB126\_mam ----TMAATPVSPPT----- 123

```

DEFB127_hsa_1      MGLFMIIAILLFQKPTVTEQLKKCWNNYVQRHCRKICRVNEVPEALCENGRYCCLNIKEL 60
DEFB127_ptr_1     MGLFMIIAILLFQKPTVTEQLKKCWNNYVQGHCRKICRVNEVPEALCENGRYCCLNIKEL 60
DEFB127_ggo_1     MGLFMIIAILLFQKPTVTEQLKKCWNNYVQGHCRKICRVNELPEALCENGRYCCLNIKEL 60
DEFB127_ppy_1     MGLFMIIAILLFQKPTVTEQLKKCWNNYVQGHCRKICRVNEVREALCENGRYCCLNINEL 60
DEFB127_hla_1     MGLFMIIAVLLFQKPTVTEQLKKCWNDYVQGRCRKICRVNEVREALCEDGRYCCLNIKEL 60
DEFB127_mfa_1     ----MIIVILLFQKPTVTEQLKTCWDNYVQGHCRKICRVN----ALCENGRYCCLNIKEL 52
DEFB127_mam_1     ----MIIVILLFQKPTVTEQLKTCWDNCVQGHCRKICRVN----ALCENGRYCCLNIKEL 52
                    ***.:*****.***:* ** :*****:*      ****:*****:**

```

P

P

```

DEFB127_hsa_1      EACKKITKPPSPKPATLALTL-QDYVTIIEINFPSL 94
DEFB127_ptr_1     EACKKITKPSHPKPATLALTL-QDYVTIIEINFPSL 94
DEFB127_ggo_1     EACKKITKPPRPKPATLALTL-QDYVTIIEINFPSL 94
DEFB127_ppy_1     EACKKITKPPHPKPATFALTLPQDYVTIIEINFPSL 95
DEFB127_hla_1     EACKKITKPPRPKPATLALTLPQDYVTIIEINFPIIL 95
DEFB127_mfa_1     EACKKITNSPHPKPATLALTLPQDYVTITEKFPIL 87
DEFB127_mam_1     EACKKITNSPHPKPATLALTLPQDYVTITEKFPIL 87
                    *****:.. *****:**** ***** *:** *

```

P

S

```

DEFB128_hsa_1      MKLFLVLIILLFEVLTGDARLKKCFNKVTGYCRKKCKVGERYEIGCLSGKLCANDEEEK 60
DEFB128_ggo_1     MKLFLVLIILLFEVLTGDARLKKCFNNVTGYCRKKCKVGERYEIGCLSGKLRCANDEEEK 60
DEFB128_ppy_1     MKLFLVLIILLFEVLTGDARLKKCFNNVTGYCRKKCKVGERYEIGCLSGKLCINDEEEK 60
DEFB128_hla_1     MKLFLVLIILLFEVLTGDARLKKCFNNITGYCRKKCKVGERYEIGCLSGKLCVNDEEEK 60
DEFB128_mfa_1     MKLFLVLIILLFEVLTGDARLKKCFNNVTGYCRKKCKVGEIHEIGCLSGKLCVNDEENK 60
DEFB128_mam_1     MKLFLVLIILLFEVLTGDARLKKCFNNVTGYCRKKCKVGEIHEIGCLSGKLCVNDEENK 60
                    *****:.. *****:**** ***** *:** *

```

```

DEFB128_hsa_1      KHSVFKKPHQHSGEKLSVLLDYIILPTITIFTV 93
DEFB128_ggo_1     KRVI----- 64
DEFB128_ppy_1     EHSVFKKPHQHSGEKLSVQQDYIILPTVTIFTV 93
DEFB128_hla_1     KHSVFKKPHQHSGEKLSVQQDYIILPTITIFAV 93
DEFB128_mfa_1     KHVPFKKPHQQPVEKLSVQQDYVILPTITIFTV 93
DEFB128_mam_1     KHVPFKKPHQQPVEKLSVQQDYVILPTITIFTV 93
                    ::*

```

DEFB129\_hsa MKLLFPIFASLMLQYQVNT<sup>EF</sup>IGLRRCLMGLGRCRDHCNVDEKEIQCKMKKCCVGPKV 60  
DEFB129\_ptr MKLLFPIFASLMLQYQVNT<sup>EF</sup>IGLRRCLMGLGRCRDHCNVDEKEIQCKMKKCCVGPKV 60  
DEFB129\_ggo MKLLFPIFASLMLQYQVNT<sup>EF</sup>IGLRRCLMGLGRCRDHCNVDEKEIQCKMKKCCVGPKV 60  
DEFB129\_ppy MKLLFPVFASLMLQYQVNT<sup>EF</sup>IGLRRCLMGLGRCRDHCNVDEKEIQCKMKKCCVGPKV 60  
DEFB129\_hla MKLLFPIFASLMLQYKVNT<sup>EF</sup>IGLRRCLMGFGRCRDHCNVDEKEIQCKMKKCCVGPKV 60  
DEFB129\_mfa MKLLFPIFASLMLQYQVNT<sup>EF</sup>IGLRSCLMGFGRCRDHCNVDEKEIQCKMKKCCVGPKV 60  
DEFB129\_mam MKLLFPIFASLMLQYQVNT<sup>EF</sup>IGLRSCLMGFGRCRDHCNVDEKEIQCKMKKCCVGPKV 60

\*\*\*\*\*:\*\*\*\*\*:\*\*\*\*\* \*\*\*:\*\*\*\*\*:\*\*\*\*\*

DEFB129\_hsa KLIK<sup>NYLQY</sup>GTPNVLNEDVQ<sup>EMLKPA</sup>KNSSAVIQ<sup>RKHILSVLPQIK</sup>ST<sup>SFFANTNFV</sup>IIP 120  
DEFB129\_ptr KLIK<sup>NYLQY</sup>GTPNVLNEDVQ<sup>EMLKPA</sup>KNSSAVIQ<sup>RKHILSVLPQIK</sup>ST<sup>SFFANTNFV</sup>IIP 120  
DEFB129\_ggo KLIK<sup>NYLQY</sup>GTPNVLNEDVQ<sup>EMLKPA</sup>KNSSAVIQ<sup>RKHILSVLPQIK</sup>ST<sup>SFFANTNFV</sup>IIP 120  
DEFB129\_ppy KLIK<sup>NYLQY</sup>GIPNVLNEDVQ<sup>EMLKPA</sup>KNSSAVIQ<sup>RKHILSVLPQIK</sup>ST<sup>SFFANTNFV</sup>IIP 120  
DEFB129\_hla KLIK<sup>NYLQY</sup>GTPNVLNEDVQ<sup>EMLKSA</sup>KNSSAVIQ<sup>RKHILSVLPQIK</sup>ST<sup>SFFANTNFV</sup>IIP 120  
DEFB129\_mfa KLIK<sup>NYLQY</sup>GTPNVLNEDVQ<sup>EMLKPA</sup>ENSSAVIQ<sup>RKHILSVLPQIK</sup>SIN<sup>FFANTNLV</sup>IIP 120  
DEFB129\_mam KLIK<sup>NYLQY</sup>GTPNVLNEDVQ<sup>EMLKPA</sup>ENSSAVIQ<sup>RKHILSVLPQIK</sup>SIN<sup>FFANTNLV</sup>IIP 120

\*\*\*\*\* \*\*\*\*\* .\*:\*\*\*\*\*:\*\*\*\*\* .\*\*\*\*\*:\*\*\*\*

DEFB129\_hsa NATPMNSATISTMT<sup>PGQITYTATSTK</sup>SNTKES<sup>SRDSATASPPPAPPP</sup>NILPT<sup>PSLELEEA</sup> 180  
DEFB129\_ptr NATPMNSATISTMT<sup>PGQITYTATSTK</sup>SNTKES<sup>SRDSATASPPPAPPP</sup>NILPT<sup>PSLELEEA</sup> 180  
DEFB129\_ggo NATPMNSATISTMT<sup>PGQITYTATSTK</sup>SNTKES<sup>SRDSATASPPPAPPP</sup>NILPT<sup>PSLELEEA</sup> 180  
DEFB129\_ppy NATPMNSATISTMT<sup>PGQITYTATSTK</sup>SNTKES<sup>SRDSATASPPPAPPP</sup>NILPT<sup>PSLELEEA</sup> 180  
DEFB129\_hla NATPMNSAIISTV<sup>TPGQITYTA</sup>ASTK<sup>SNIKESRDSATASPPPAPPP</sup>NILPT<sup>PSLELEEA</sup> 173  
DEFB129\_mfa NATPVNSATVSTMT<sup>TSGQITYTATSAK</sup>SNTKES<sup>SGDSATASPPPAPPP</sup>NILPT<sup>PSLELEEA</sup> 180  
DEFB129\_mam NATPVNSATVSTMT<sup>TSGQITYTATSTK</sup>SNTKES<sup>SRDSATASPPPAPPP</sup>NILPT<sup>PSLELEEA</sup> 180

\*\*\*\*:\*\*\* :\*:\*. \*\*\*\*\*:\*.\*\*\* \*\*\* \*\*\*\*\* .\*\*\*\*\* \*\*\*\*

DEFB129\_hsa EEQ 183  
DEFB129\_ptr EEQ 183  
DEFB129\_ggo EEQ 183  
DEFB129\_ppy EEQ 183  
DEFB129\_hla ---  
DEFB129\_mfa EEQ 183  
DEFB129\_mam EEQ 183

DEFB132\_hsa\_1 MKFLLLVLAAALGFLTQVIPASAGGSKCVSNTPGYCRITCCHWGETALFMCNASRKCCISYS 60  
 DEFB132\_ptr\_1 MNFLLLVLAAALGFLTQVIPASAGGSKCVSNTPGYCRITYCHWGETALFMCNASRKCCVSY 60  
 DEFB132\_ggo\_1 MKFLLLVLAAALGFLTQVIPASAGGSKCVSNTPAYCRITYCHWGETALFMFNASRKCCISYS 60  
 DEFB132\_ppy\_1 MKFLLLVLAAALRFLTQVIPASAGGSKCVSNTPGYCRITYCHQGETALFMCNASRKCCVSY 60  
 DEFB132\_hla\_1 MKFLLLVLAAALRFLTQVIPASGGGSKCVSDTQGYCRITYCHQGETALFMCNASRKCCASY 60  
 DEFB132\_mfa\_1 MKFLLLVLAAALGFLTQVIPASGGGSKCVSDTPGYCRTHCHRGETALFMCSPPFRKCCISYS 60  
 DEFB132\_mam\_1 MKFLLLVLAAALGFLTQVIPASGGGSKCVSDTPGYCRTHCHRGETALFMCSPPFRKCCISYS 60  
 \*:\*\*\*\*\* .\*\*\*\*\*:\* .\*\*\*\* \* \*\*\*\*\* .. \*\*\*\* \*  
 P S

DEFB132\_hsa\_1 FLPKPDLPQLIGNHWQSRRRNTQRKDKKQQTTVTS- 95  
 DEFB132\_ptr\_1 FLPKADLPRLIGNHWQSRRRNTQRKDKKQQTTVTS- 95  
 DEFB132\_ggo\_1 FLPKPDLPQLIGNHWQSRR-NTQRKDKKQQTTVTS- 94  
 DEFB132\_ppy\_1 FLPKPDLPQLIGNHWQSRRRNTQRKDKKQQTTVTS- 95  
 DEFB132\_hla\_1 FLPKPDLPQLIGNHWQSRRRNTQRKDKKQQTTVTSS 96  
 DEFB132\_mfa\_1 FLPQPDLPQLIGNHWPSRSRNTQRKNKKQQTTVTP- 95  
 DEFB132\_mam\_1 FLPQPDLPQLIGNHWPSRSRNTQRKNKKQQTTVTP- 95  
 \*\*\*: .\*\*\*:\*\*\*\*\* \*\* \*\*\*\*\*:\*\*\*\*\* .  
 P P P
